# Supplementary material for: PSMA-RLT in Patients with Metastatic Hormone-Sensitive Prostate Cancer: A Retrospective Study
Source: MDPI journal article supplement (doi:10.3390/cancers15010297), 2022-12-31
Supplement: s1 [file s1]

## Supplementary files

Supplementary Table S1

Administrated activity of  $^{177}\text{Lu}$ - and  $^{225}\text{Ac}$ -PSMA for each individual patient

| Cycles<br>PSMA – RLT activity | 1                 |                   | 2                 |                   | 3                 |                   | 4                 |                   | 5                 |                   | 6                 |                   |
|-------------------------------|-------------------|-------------------|-------------------|-------------------|-------------------|-------------------|-------------------|-------------------|-------------------|-------------------|-------------------|-------------------|
|                               | $^{177}\text{Lu}$ | $^{225}\text{Ac}$ |
| Patient 1                     | 8.5               |                   | 7.4               |                   |                   |                   |                   |                   |                   |                   |                   |                   |
| Patient 2                     | 7.4               |                   | 7.4               |                   | 7.3               |                   |                   |                   |                   |                   |                   |                   |
| Patient 3                     | 7.5               |                   | 7.5               |                   | 7.4               |                   |                   |                   |                   |                   |                   |                   |
| Patient 4                     | 7.4               |                   | 6.9               |                   | 6.9               |                   | 7.0               |                   |                   |                   |                   |                   |
| Patient 5                     | 7.4               |                   | 7.4               |                   |                   |                   |                   |                   |                   |                   |                   |                   |
| Patient 6                     | 3.1               |                   | 6.1               |                   | 6.2               |                   |                   |                   |                   |                   |                   |                   |
| Patient 7                     | 3.1               |                   | 6                 |                   |                   |                   |                   |                   |                   |                   |                   |                   |
| Patient 8                     | 3                 |                   | 6                 |                   |                   |                   |                   |                   |                   |                   |                   |                   |
| Patient 9                     | 6.2               |                   | 6.2               |                   |                   |                   |                   |                   |                   |                   |                   |                   |
| Patient 10                    | 3.1               |                   | 6                 |                   |                   |                   |                   |                   |                   |                   |                   |                   |
| Patient 11                    | 8.5               |                   | 7.4               |                   |                   |                   |                   |                   |                   |                   |                   |                   |
| Patient 12                    | 6.6               |                   | 5.7               |                   | 7.4               |                   | 7.3               |                   | 7.2*              | 6.0*              | 7.3*              | 6.0*              |
| Patient 13                    | 3                 |                   | 5.9               |                   |                   |                   |                   |                   |                   |                   |                   |                   |
| Patient 14                    | 3                 |                   | 6                 |                   | 7.3               |                   |                   |                   |                   |                   |                   |                   |
| Patient 15                    | 3                 |                   | 6                 |                   |                   |                   |                   |                   |                   |                   |                   |                   |
| Patient 16                    | 3.1               |                   | 6                 |                   |                   |                   |                   |                   |                   |                   |                   |                   |
| Patient 17                    | 3                 |                   | 6                 |                   |                   |                   |                   |                   |                   |                   |                   |                   |
| Patient 18                    | 5.6               | 2.4               | 5.3               | 1.3               |                   | 2.2               | 7.4               |                   | 7.4               |                   | 6.2*              | 6.1*              |
| Patient 19                    | 6.3               |                   | 5.8               |                   | 7.3               |                   |                   |                   |                   |                   |                   |                   |
| Patient 20                    | 3                 |                   | 4.9               |                   |                   |                   |                   |                   |                   |                   |                   |                   |

\*Indicates cycles in which the radioligand label PSMA-I&T was utilized, for the remaining cycles PSMA-617 was applied.
